# Supplementary material for: Targeting POLR1A induces apoptosis and inhibits hepatocellular carcinoma proliferation through upregulation of IFI27 transcription
Source: Research Square preprint supplement (doi:10.21203/rs.3.rs-8584114/v1), 2026-02-16
Supplement: Supplementary file 1 [file 2c416a17e064c2197e777eb4.docx]

| **Primer’s name** | **Directional** | **Sequence (5’-3’)** |
| --- | --- | --- |
| POLR1A | Forward | GCGTAGCATAGTCCTCCACC |
| Reverse | TCTAGAAGGACACCTCGCCA |
| IFI27 | Forward | CCTCTGGCTCTGCCGTAGTTTTG |
| Reverse | GTGAAGCCCATGGCACTGAGC |
| β-actin | Forward | GGCGGCACCACCATGTACCCT |
|  | Reverse | AGGGGCCGGACTCGTCATACT |
| HDAC1 | Forward | CTCACCGAATCCGCATGACT |
| Reverse | TGGCTTTGTGAGGGCGATAG |
| IFI27 promoter | Forward 1 | GCCATGGGTAACTGACAACA |
| Reverse 1 | AACCCTGTCCGAAGCATACT |
| Forward 2 | AACCACCTGCCTAGATTGCT |
| Reverse 2 | AGTCCGTTGAACTCTGAGCA |
