# Supplementary material for: Targeting POLR1A induces apoptosis and inhibits hepatocellular carcinoma proliferation through upregulation of IFI27 transcription
Source: Research Square preprint supplement (doi:10.21203/rs.3.rs-8584114/v1), 2026-02-16
Supplement: Supplementary file 2 [file a275f6fc755222c823b3224b.docx]

### **Abbreviations**

| Acronym | Full Form |
| --- | --- |
| Bax | BCL2-Associated X |
| Bcl-2 | B cell lymphoma-2 |
| Caspase3 | Cysteinyl aspartate specific proteinase 3 |
| Caspase9 | Cysteinyl aspartate specific proteinase 9 |
| CHX | Actinomycin ketone |
| Co-IP | Co-immunoprecipitation |
| DAB | 3,3’-diaminobenzidine |
| DFS | Disease Free Survival |
| DMSO | Dimethyl sulfoxide |
| FBS | Fetal Bovine Serum |
| HCC | Hepatocellular carcinoma |
| IFI27 | Interferon Alpha Inducible Protein 27 |
| IHC | Immunohistochemical |
| MG-132 | Z-Leu-Leu-Leu-al |
| OS | Overall Survival |
| POLR1A | RNA Polymerase I Subunit A |
| qPCR | Quantitative reverse transcription Polymerase Chain Reaction |
| TEM | Transmission electron microscopy |
| TMA | Tissue microarray |
| TS | TNF-α+SM-164 |
| Ub | Ubiquitination |
| WB | Western blot |
| ZVF | Z-VAD-FMK |
| α-tubulin | Alpha-tubulin |
