# Supplementary material for: Targeting POLR1A induces apoptosis and inhibits hepatocellular carcinoma proliferation through upregulation of IFI27 transcription
Source: Research Square preprint supplement (doi:10.21203/rs.3.rs-8584114/v1), 2026-02-16
Supplement: Supplementary file 3 [file c25a3dc9e94d8f3943b574d2.docx]

Full and uncropped western blot for figure 1C


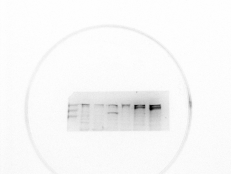

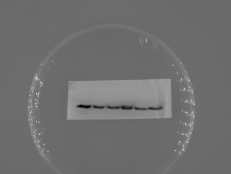


POLR1A GAPDH

Full and uncropped western blot for figure 1D


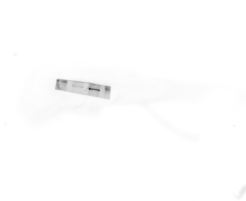

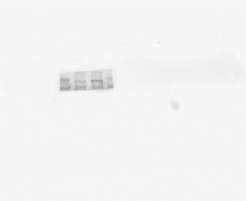

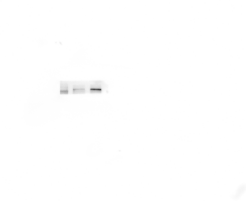

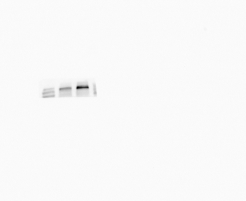

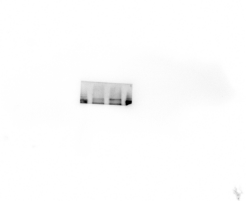


POLR1A 1 POLR1A 2 POLR1A 3 POLR1A 4 POLR1A 5


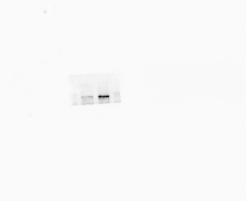

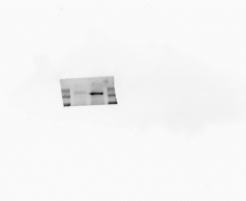

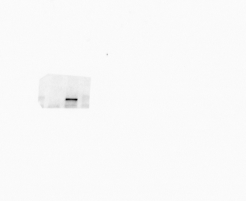

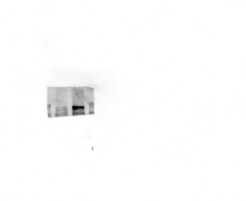

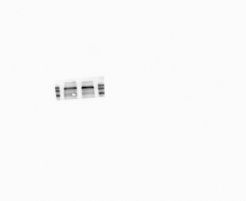


POLR1A 6 POLR1A 7 POLR1A 8 POLR1A 9 POLR1A 10


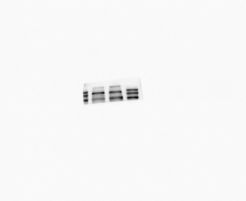

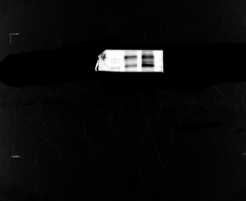

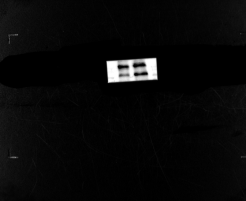

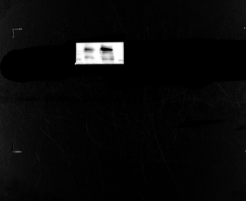

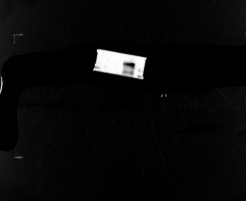


POLR1A 11 POLR1A 12 POLR1A 13 POLR1A 14 POLR1A 15


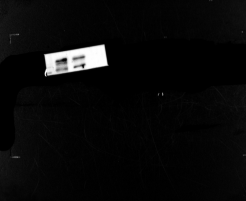

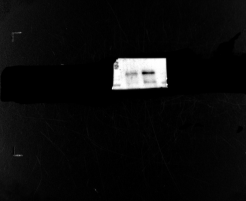

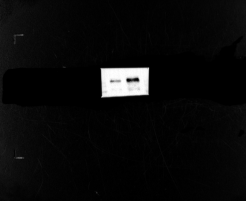

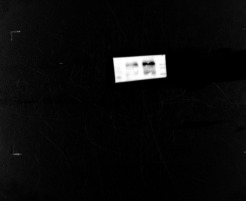


POLR1A 16 POLR1A 17 POLR1A 18 POLR1A 19


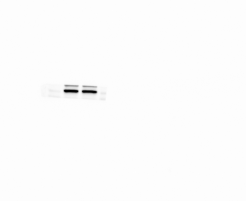

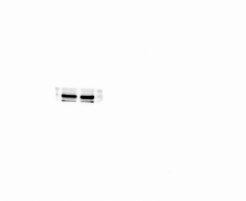

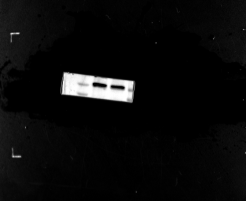

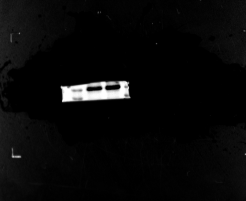

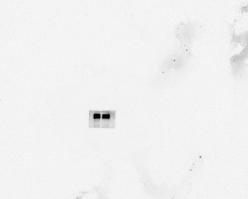


α-Tubulin 1 α-Tubulin 2 α-Tubulin 3 α-Tubulin 4 α-Tubulin 5


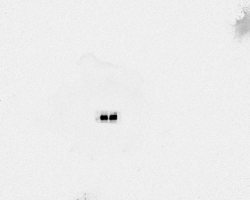

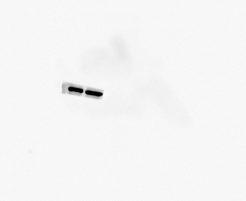

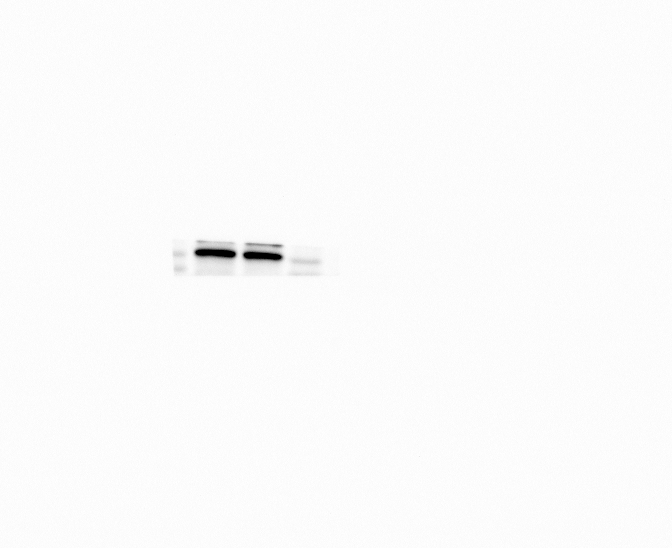

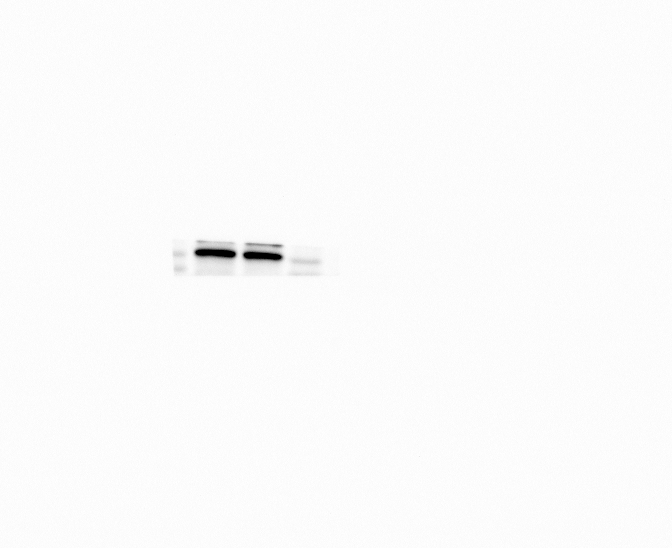

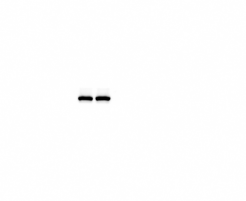


α-Tubulin 6 α-Tubulin 7 α-Tubulin 8 α-Tubulin 9 α-Tubulin 10


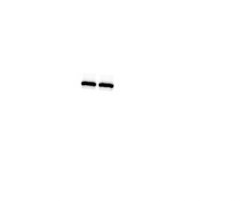

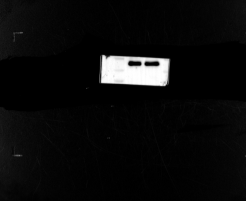

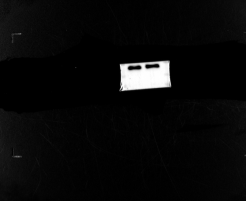

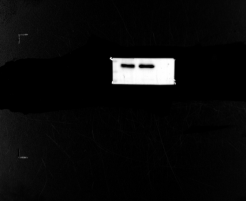

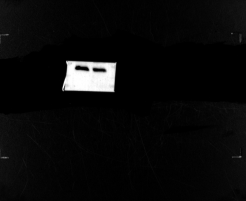


α-Tubulin 11 α-Tubulin 12 α-Tubulin 13 α-Tubulin 14 α-Tubulin 15


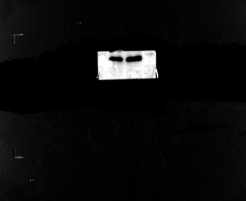

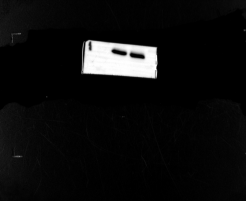

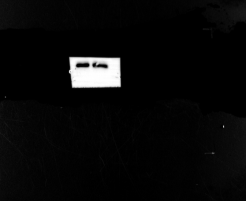

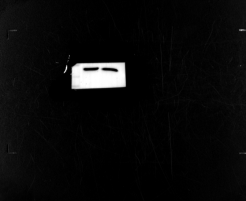


α-Tubulin 16 α-Tubulin 17 α-Tubulin 18 α-Tubulin 19

Full and uncropped western blot for figure 2A


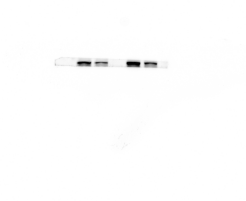

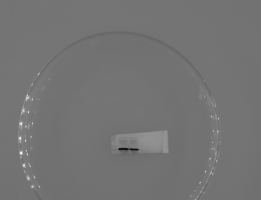


POLR1A α-Tubulin

Full and uncropped western blot for figure 2B


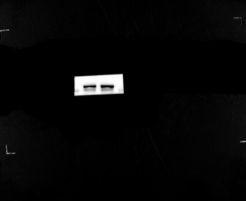

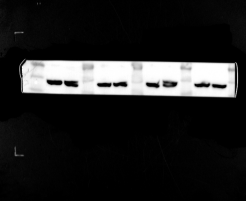


POLR1A α-Tubulin

Full and uncropped western blot for figure 2I


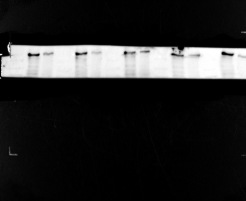

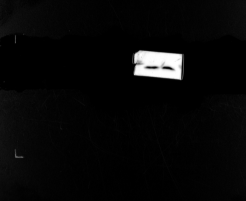


POLR1A Bax


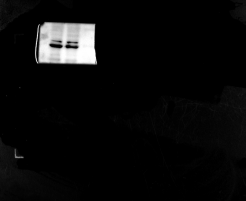

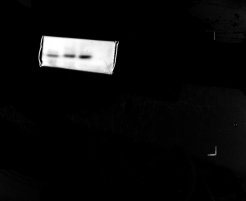


caspase3 cleaved caspase3


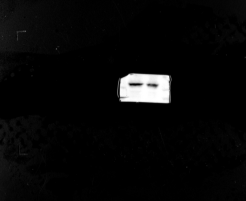

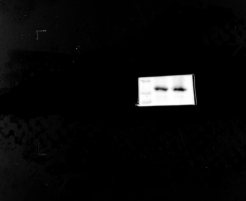


caspase9 cleaved caspase9


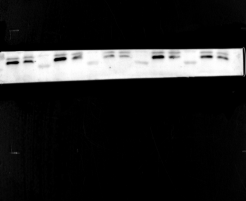

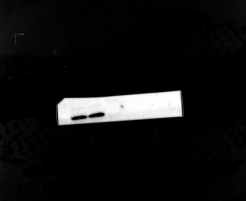


Bcl2 α-Tubulin

Full and uncropped western blot for figure 3C


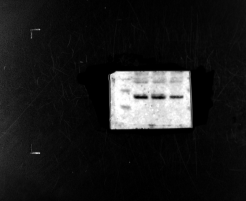

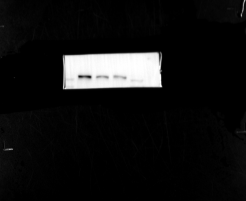

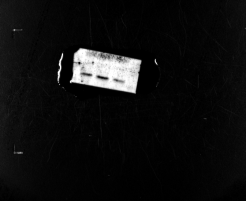

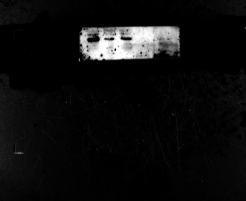

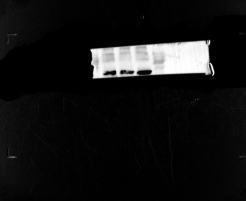


IFI27 POLR1A Bax Bcl-2 caspase3


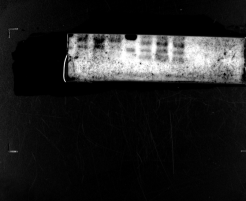

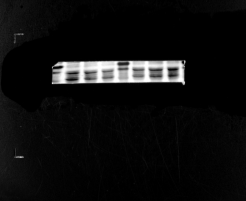

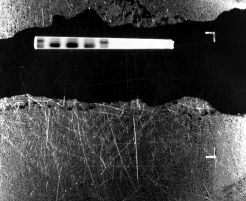

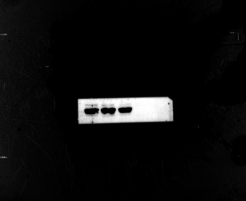


cleaved caspase3 capase9 cleaved caspase9 α-Tubulin

Full and uncropped western blot for figure 5B


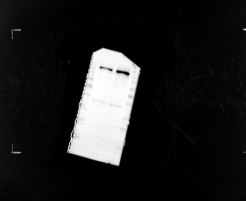

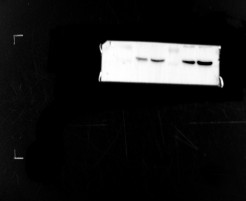

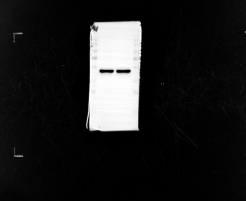


POLR1A(v,oe-POLR1A) HDAC1（v,oe-POLR1A） α-Tubulin(v,oe-POLR1A)


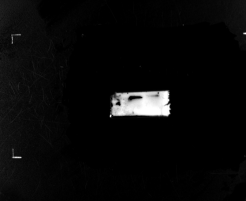

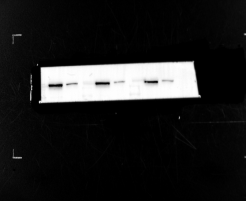

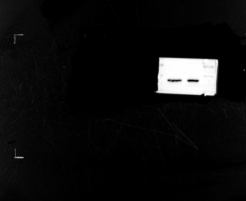


POLR1A(sh-NC,sh-POLR1A) HDAC1（sh-NC,sh-POLR1A） α-Tubulin(c,sh-POLR1A)

Full and uncropped western blot for figure 6B


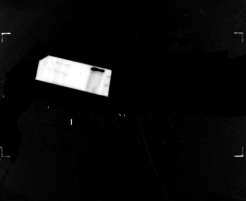

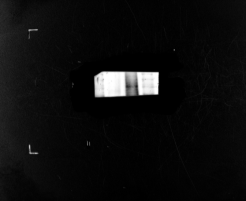

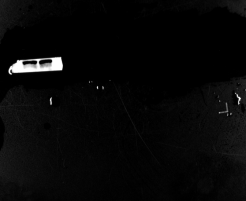


IP.POLR1A(IgG,POLR1A) IP.USP36(IgG,POLR1A） input POLR1A(IgG,POLR1A)


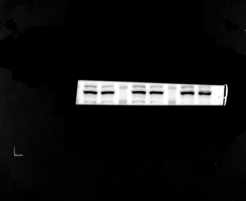

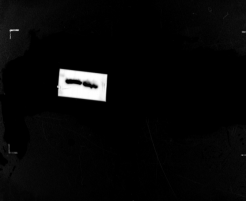


Input USP36(IgG,POLR1A) Input.α-Tubulin(IgG,POLR1A)


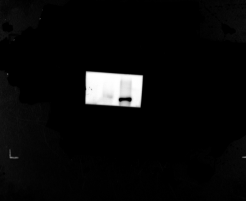

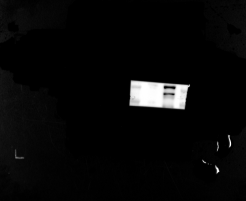

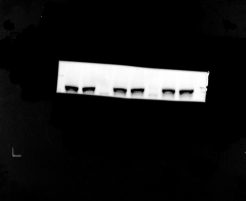


IP.POLR1A(IgG,USP36) IP.USP36(IgG,USP36) input.POLR1A(IgG,USP36)
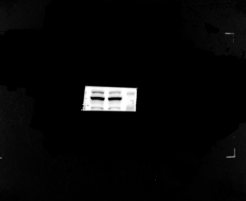

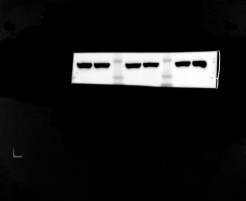


Input.USP36 input.α-Tubulin

Full and uncropped western blot for figure 6C


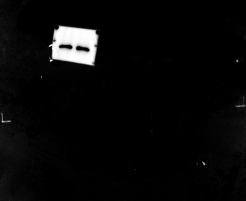

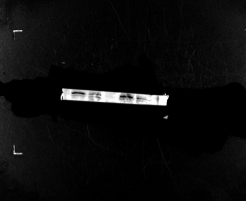

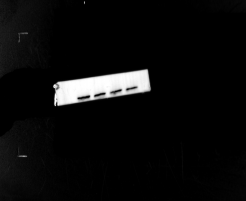


α-Tubulin (sh-NC,sh-usp36) USP36(sh-NC,sh-USP36) POLR1A（chx）sh-NC


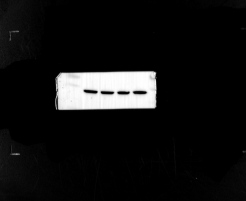

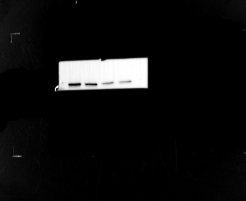

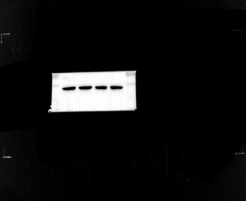


α-Tubulin（chx）sh-NC POLR1A(chx) sh-USP36 α-Tubulin (chx) sh-USP36

Full and uncropped western blot for figure 6E


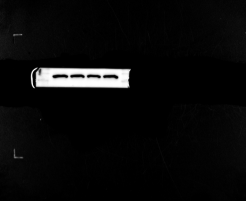

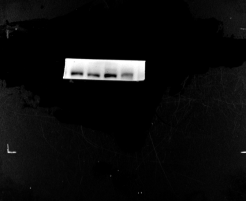

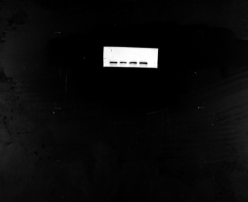


α-Tubulin (MG132) USP36(MG132) POLR1A(MG132)

Full and uncropped western blot for figure 6F


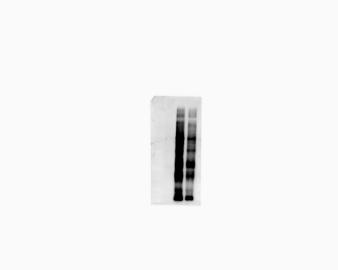

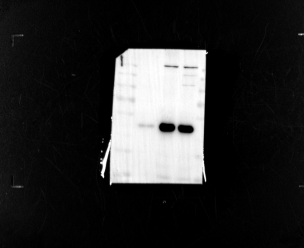

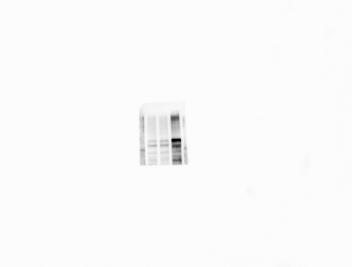


Ip.myc Ip.Flag Input.His


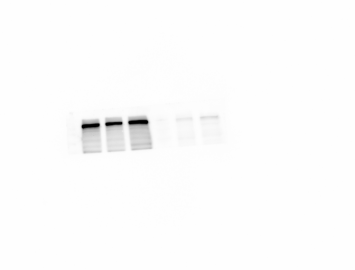

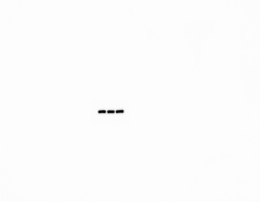


Input.Flag Input.α-Tubulin

Full and uncropped western blot for figure 6G


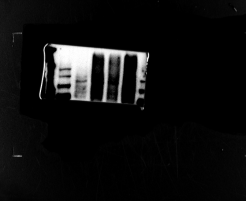

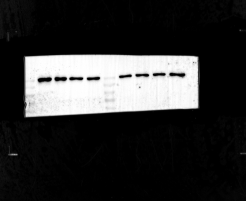

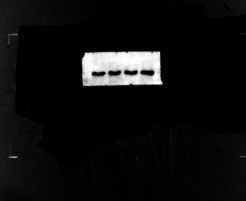


Ip.myc Ip.Flag Input.Flag


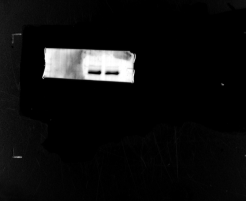

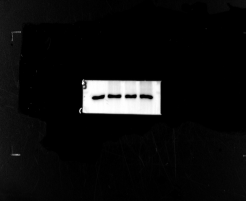


Input.His Input.α-Tubulin

Full and uncropped western blot for figure 7A


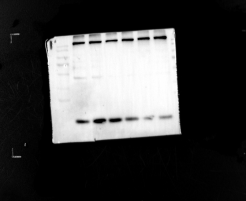

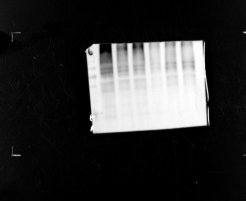

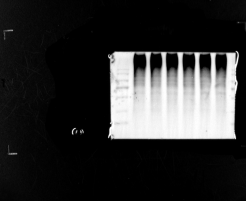


Ip.Flag Ip.myc Input.myc


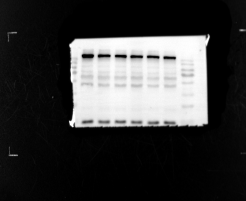


Input.Flag Input.His Flag.α-Tubulin

Full and uncropped western blot for figure 7B

Ip.Flag Ip.Myc Input.Myc Input.Flag

Input.His Input.α-Tubulin

Full and uncropped western blot for figure 7D

Ip.His Ip.Flag Input.Flag Input.His

Full and uncropped western blot for figure 7F

Ip.FlagI p.His Input.His Input.Flag

Full and uncropped western blot for Supplymentary Figure 1A

POLR1A(sh-NC,sh-POLR1A) α-Tubulin(sh-nc,sh-POLR1A)

Full and uncropped western blot for Supplymentary Figure 1B

POLR1A(vector,oe-POLR1A) α-Tubulin(vector,oe-POLR1A)

Full and uncropped western blot for Supplymentary Figure 1I

POLR1A Bax caspase3

cleaved caspase3 Caspase 9 Cleaved caspase9

Bcl-2 α-Tubulin

Full and uncropped western blot for Supplymentary Figure 2B

Bax caspase3 cleaved caspase3

Caspase9 cleaved caspase9 α-Tubulin

Full and uncropped western blot for Supplymentary Figure 2C

Bcl-2 Caspase3 cleaved caspase3

IFI27 Bax α-Tubulin

POLR1A caspase9 cleaved caspase9

Full and uncropped western blot for Supplymentary Figure 3C

POLR1A.ip(IgG,POLR1A) USP36.IP(IgG,POLR1A) POLR1A.inPUT.(IgG,POLR1A)

α-Tubulin USP36.input(IgG,POLR1A)

α-Tubulin.input(IgG,usp36) USP36.input(IgG,USP36) USP36.Ip(IgG,USP36)

POLR1A.input(IgG,USP36) POLR1A.ip(IgG,POLR1A)

Full and uncropped western blot for Supplymentary Figure 3D

USP36 α-Tubulin

POLR1A α-Tubuin

POLR1A α-Tubulin
